CORRECTION

# Correction: Temperature Stress Mediates Decanalization and Dominance of Gene Expression in *Drosophila melanogaster*

The PLOS Genetics Staff

## Notice of Republication

This article was republished on May 26, 2015, to include details of the editor who handled the submission, which had been omitted due to an error in production. Please download this article again to view the correct version. The originally published, uncorrected article and the republished, corrected article are provided here for reference.

## Supporting Information

**S1 File. Originally published, uncorrected article.**

(PDF)

**S2 File. Republished corrected article.**

(PDF)

## Reference

1. Chen J, Nolte V, Schlötterer C (2015) Temperature Stress Mediates Decanalization and Dominance of Gene Expression in *Drosophila melanogaster*. PLoS Genet 11(2): e1004883. doi: [10.1371/journal.pgen.1004883](https://doi.org/10.1371/journal.pgen.1004883) PMID: [25719753](https://pubmed.ncbi.nlm.nih.gov/25719753/)

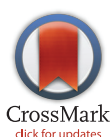

## OPEN ACCESS

**Citation:** The PLOS Genetics Staff (2015) Correction: Temperature Stress Mediates Decanalization and Dominance of Gene Expression in *Drosophila melanogaster*. PLoS Genet 11(6): e1005315. doi:10.1371/journal.pgen.1005315

**Published:** June 15, 2015

**Copyright:** © 2015 The PLOS Genetics Staff. This is an open access article distributed under the terms of the [Creative Commons Attribution License](https://creativecommons.org/licenses/by/4.0/), which permits unrestricted use, distribution, and reproduction in any medium, provided the original author and source are credited.
